# Supplementary material for: Hyperbranched polyol decorated carbon nanotube by click chemistry for functional polyurethane urea hybrid composites
Source: Royal Society of Chemistry journal article supplement (doi:10.1039/c4ra02442g), 2014-01-01
Supplement: c4ra02442g1.pdf [file c4ra02442g1.pdf]

## Hyperbranched polyol decorated carbon nanotube by click chemistry for functional polyurethane urea hybrid composites

Sasidhar Kantheti<sup>a</sup>, Rohit Ranganathan Gaddam<sup>a,b</sup>, Ramanuj Narayan<sup>a</sup>, K.V.S.N Raju<sup>a\*</sup>

<sup>a</sup> CSIR-Indian Institute of Chemical Technology, Hyderabad -500007, INDIA

<sup>b</sup> Amity Institute of Nanotechnology, Amity University, Noida-201301, INDIA

Address correspondence to:

K. V. S. N. Raju,

Division of Polymers & Functional Materials, Indian Institute of Chemical Technology,  
Hyderabad-500007, India

E-mail: [kvsnrju@iict.res.in](mailto:kvsnrju@iict.res.in); [drkvsnrju@gmail.com](mailto:drkvsnrju@gmail.com)

---

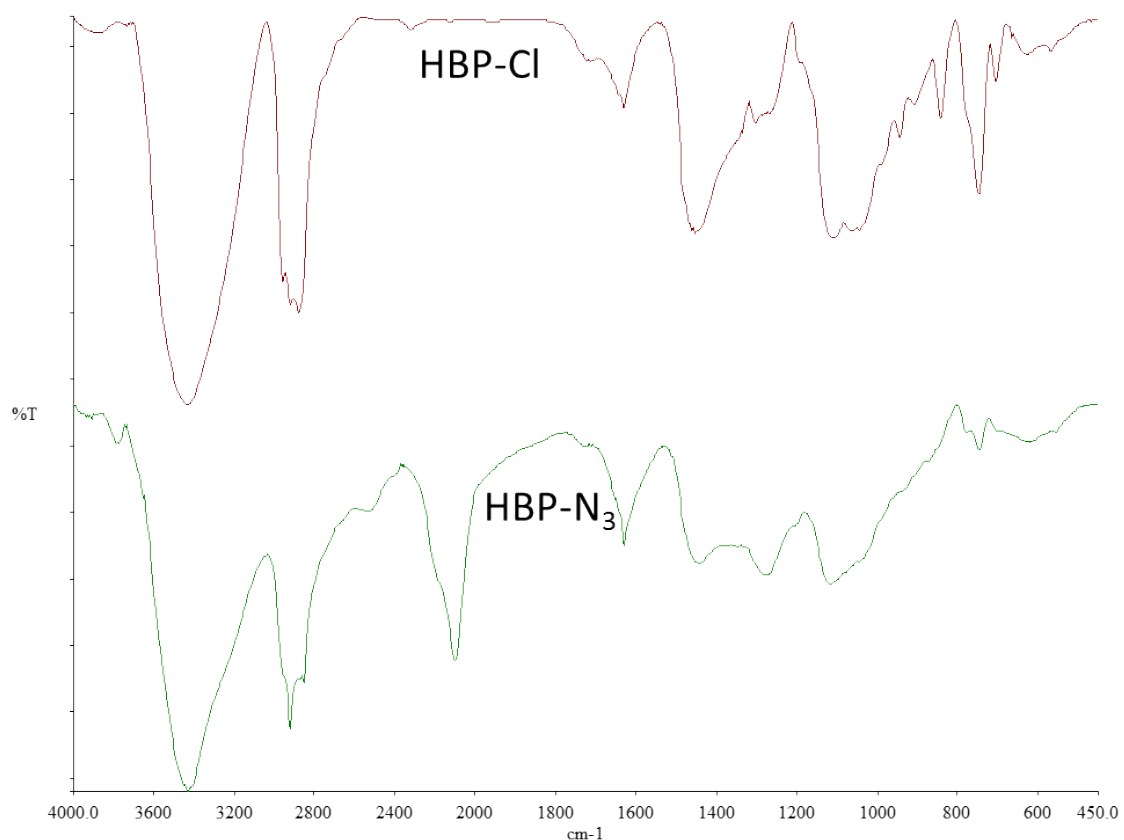

**Figure S1.** FT-IR spectra of (a) HBP-Cl and (b) HBP-N<sub>3</sub>

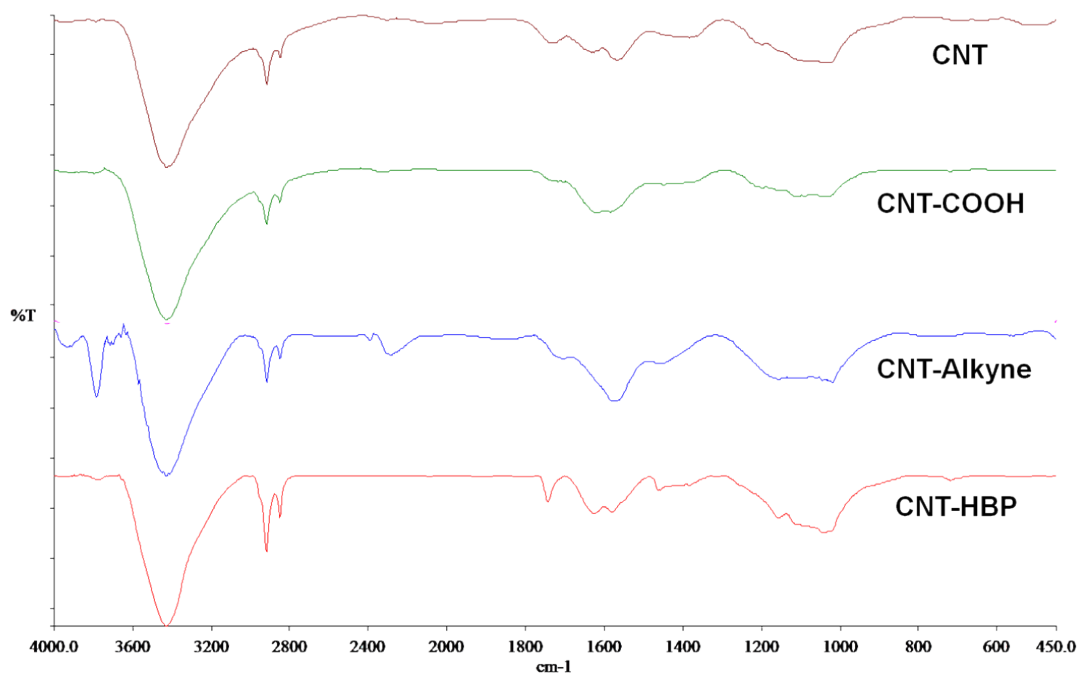

**Figure S2.** FT-IR spectra of pristine CNT, CNT-COOH, CNT-Alkyne and CNT-HBP

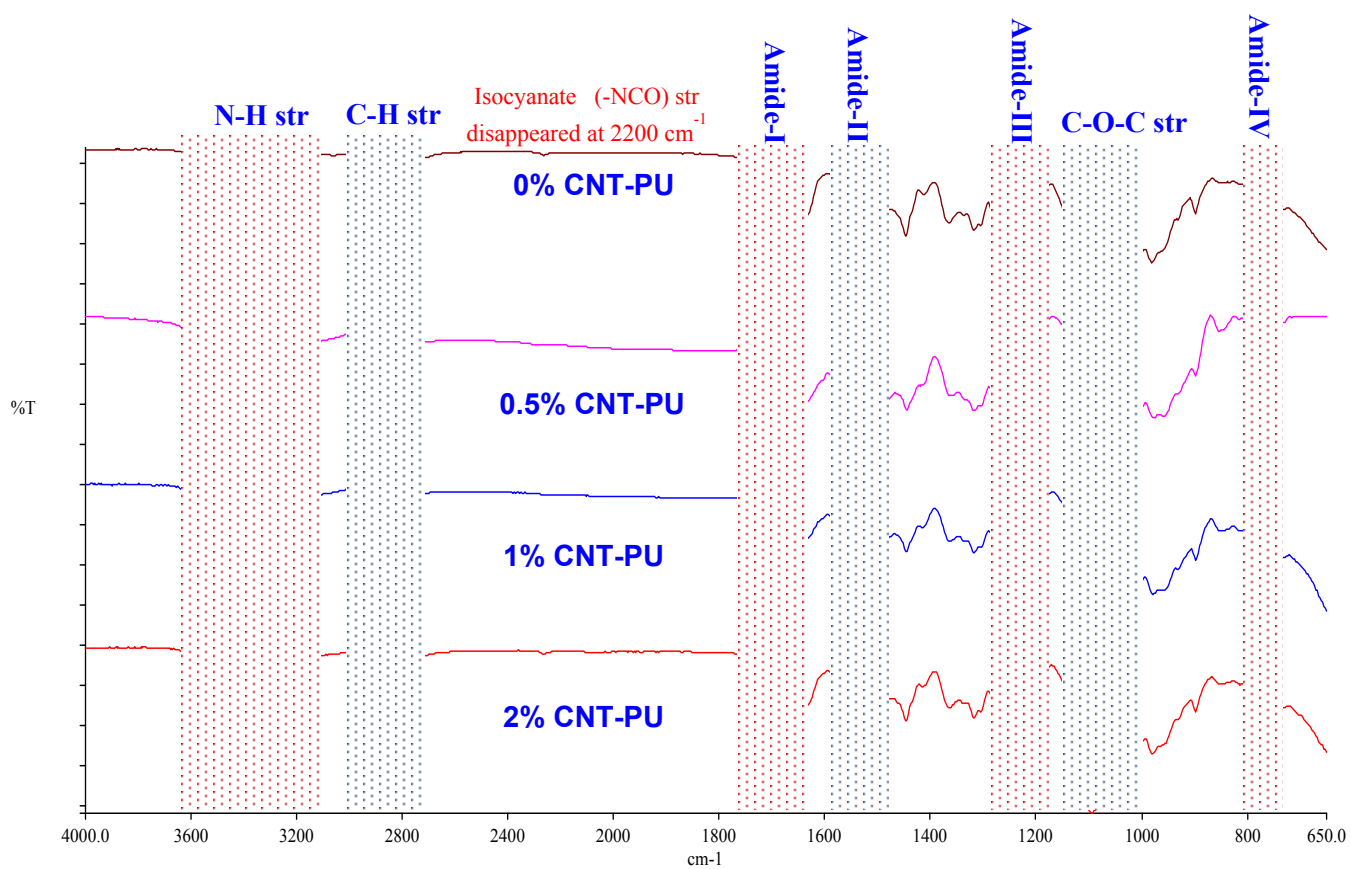

**Figure S3.** FT-IR spectra of 0%,0.5%, 1% and 2% CNT-PU

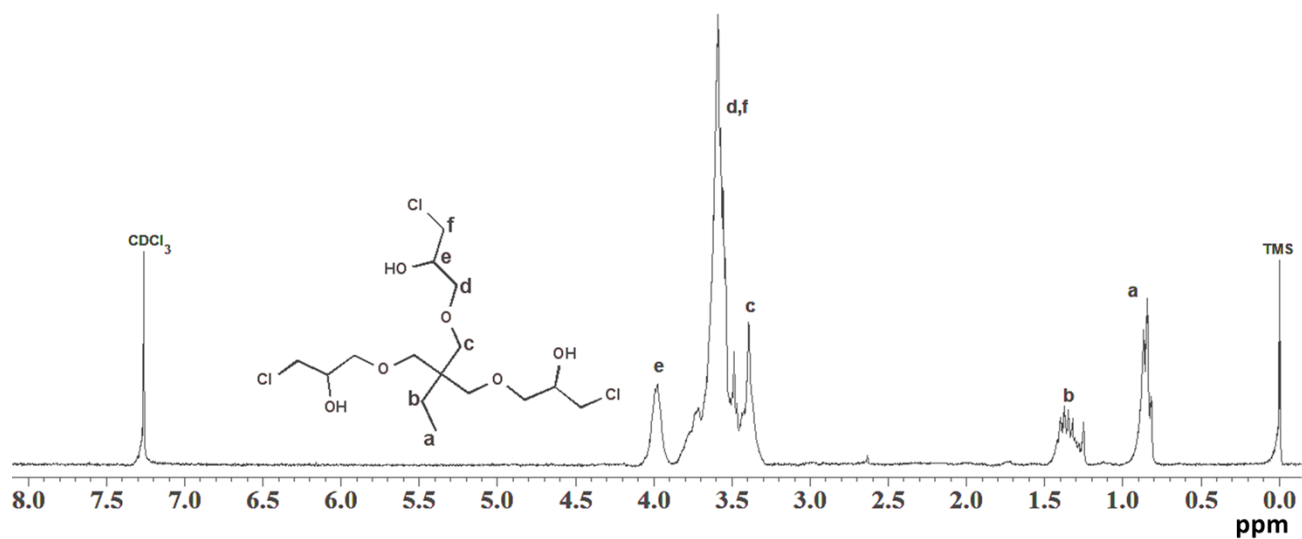

**Figure S4.** <sup>1</sup>H-NMR spectra of HBP-Cl

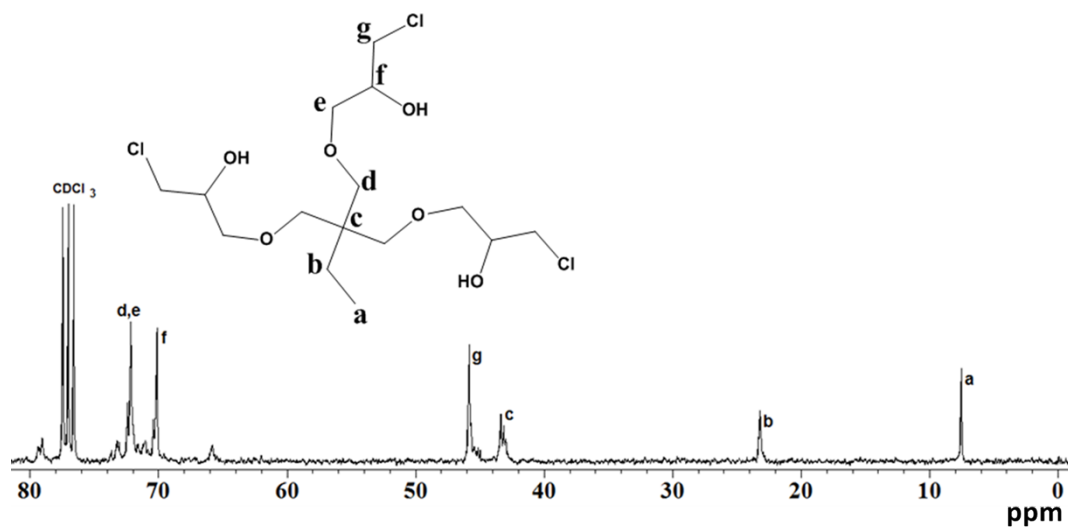

**Figure S5.** <sup>13</sup>C-NMR spectra of HBP-Cl

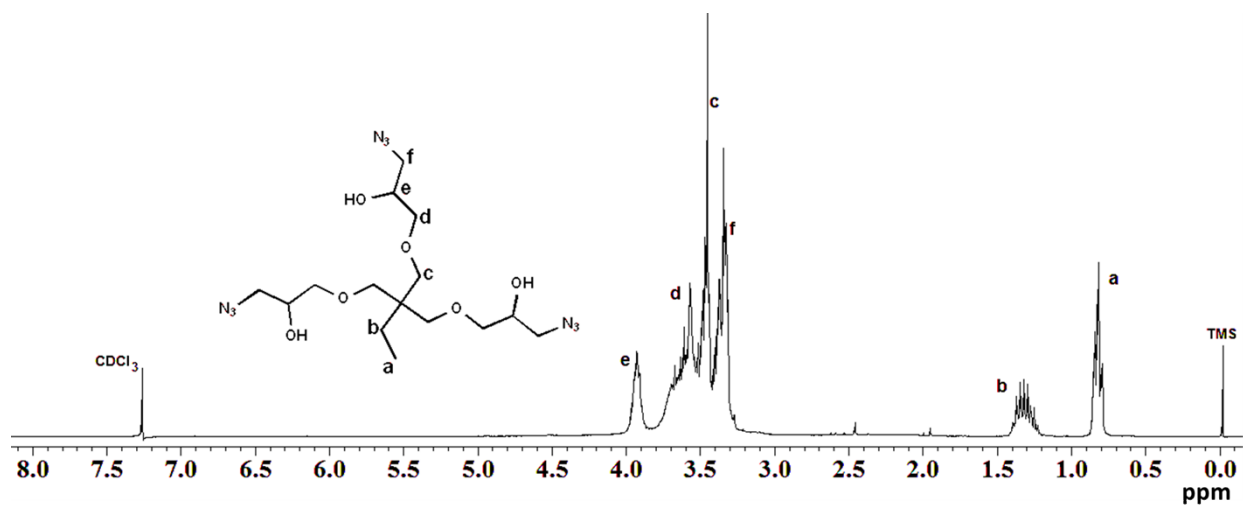

Figure S6. <sup>1</sup>H-NMR spectra of HBP-N<sub>3</sub>

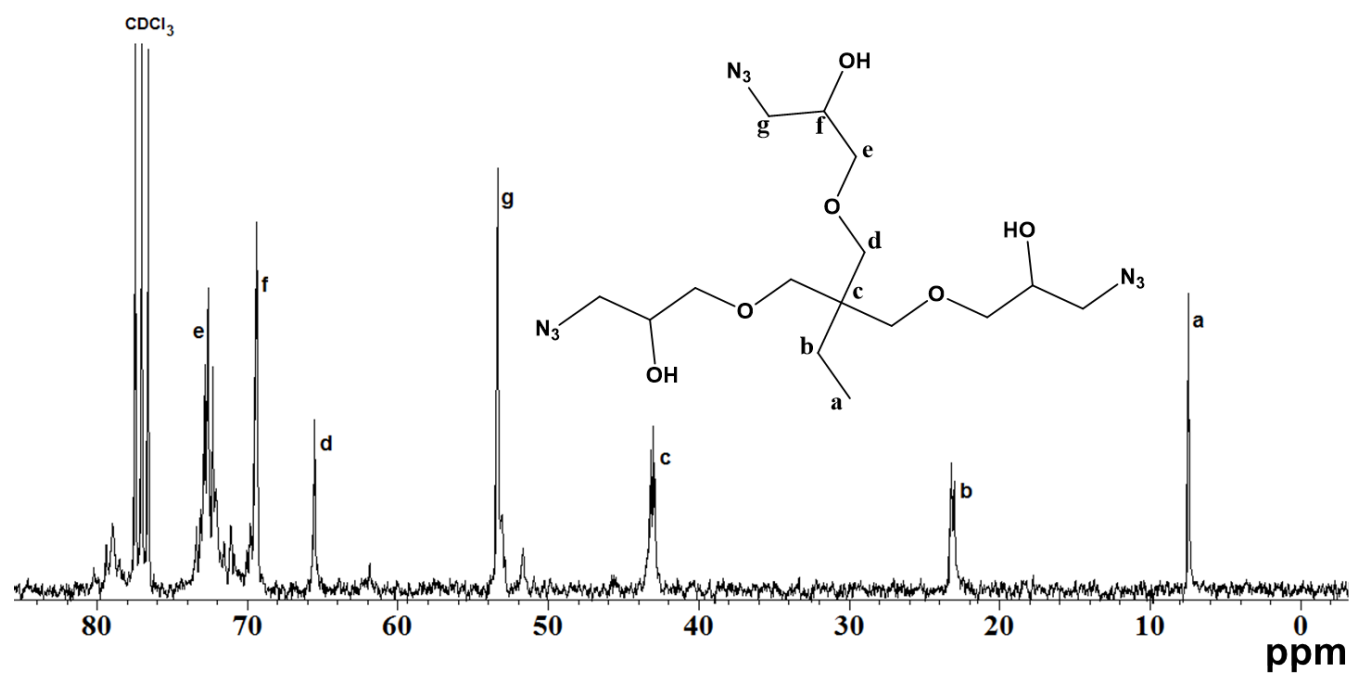

Figure S7. <sup>13</sup>C-NMR spectra of HBP-N<sub>3</sub>

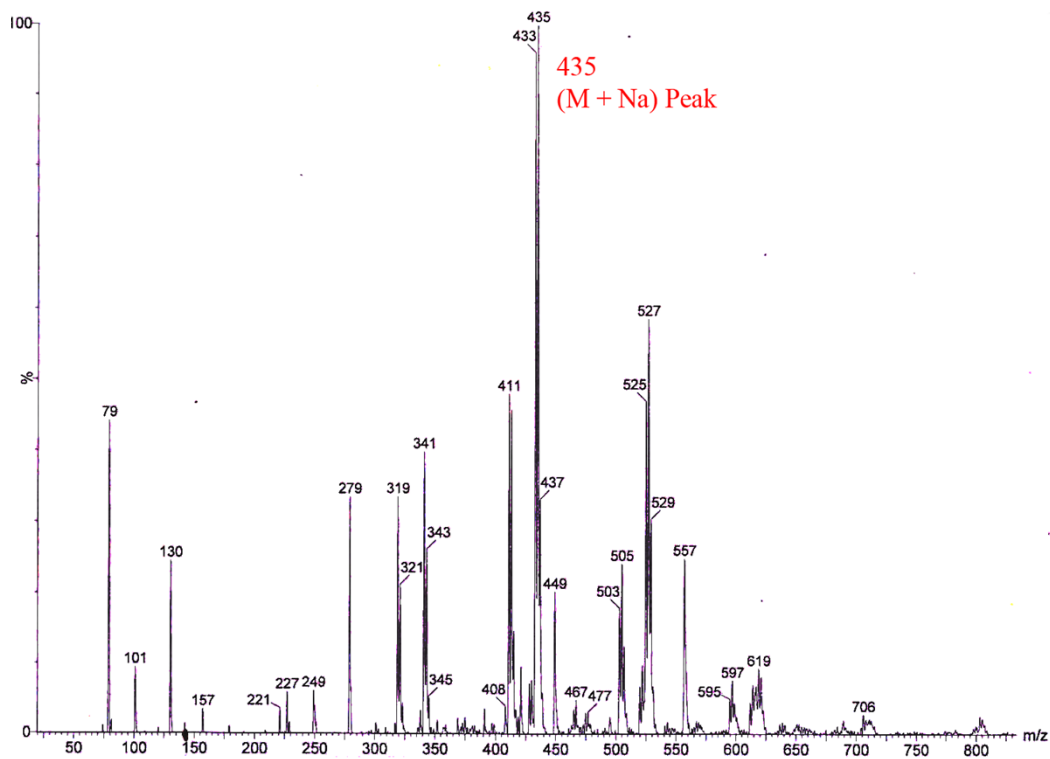

**Figure S8.** ESI-MS spectra of HBP-Cl

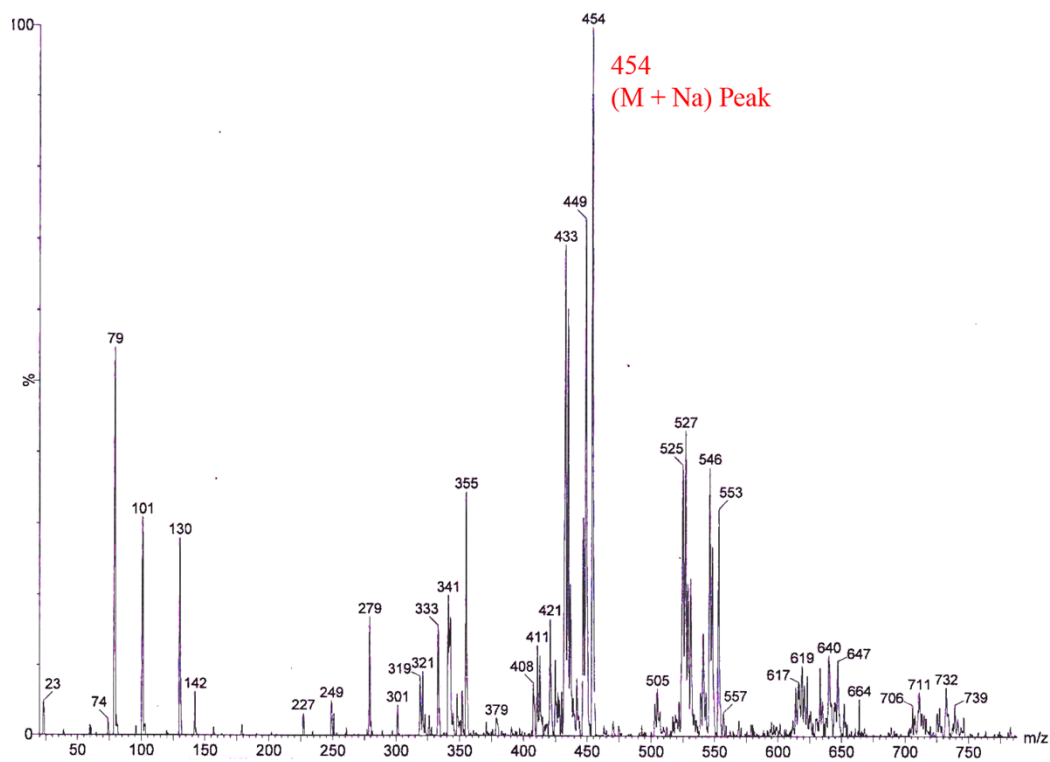

**Figure S9.** ESI-MS spectra of HBP-N<sub>3</sub>

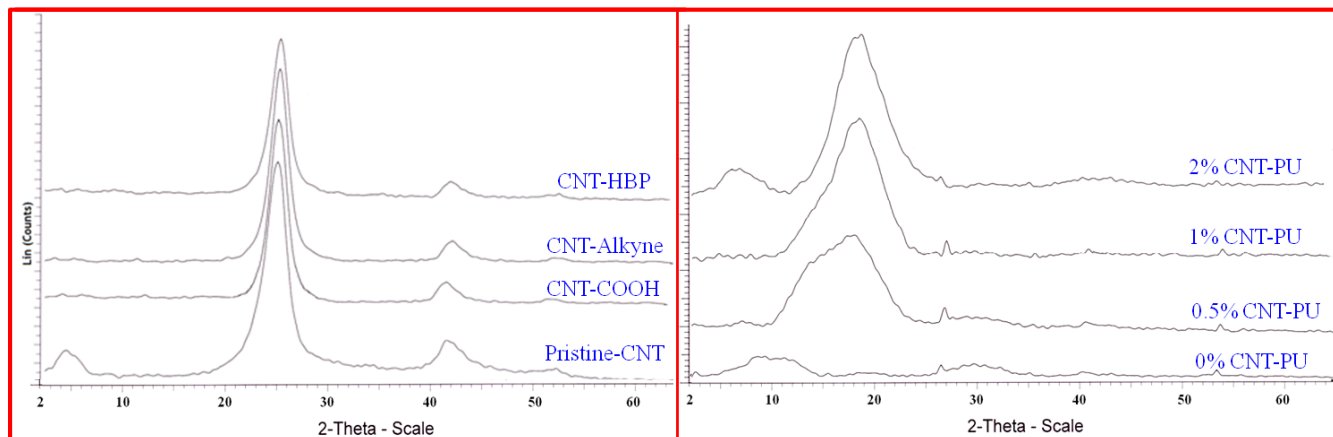

**Figure S10.** XRD profiles of various CNTs and CNT-PUs

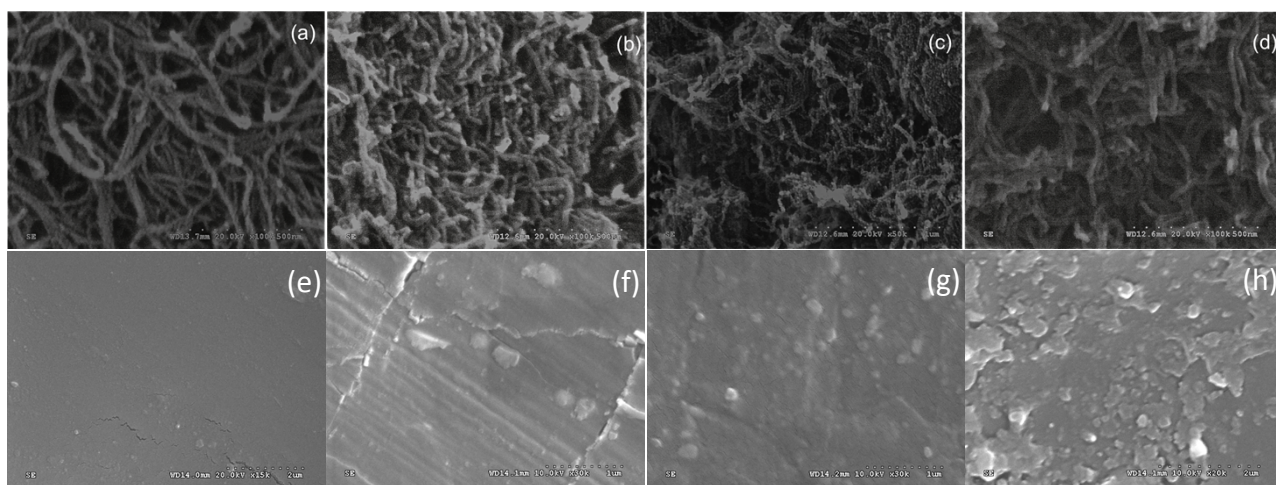

**Figure S11.** FE-SEM images of (a) pristine CNT, (b) CNT-COOH, (c) CNT-Alkyne, (d) CNT-HBP, (e) 0% CNT-PU, (f) 0.5% CNT-PU, (g) 1% CNT-PU and (h) 2% CNT-PU

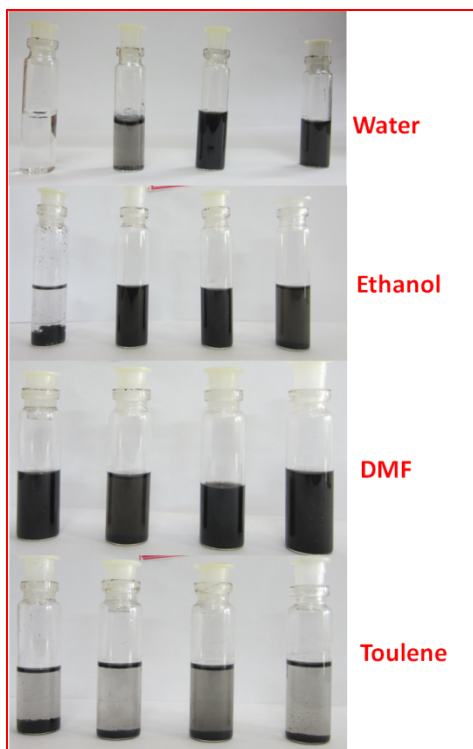

**Figure S12.** Photographs of vials containing the dispersions of (a) Pristine CNT (b) CNT-COOH (c) CNT-Alkyne and (d) CNT-HBP (left to right) in various solvents.

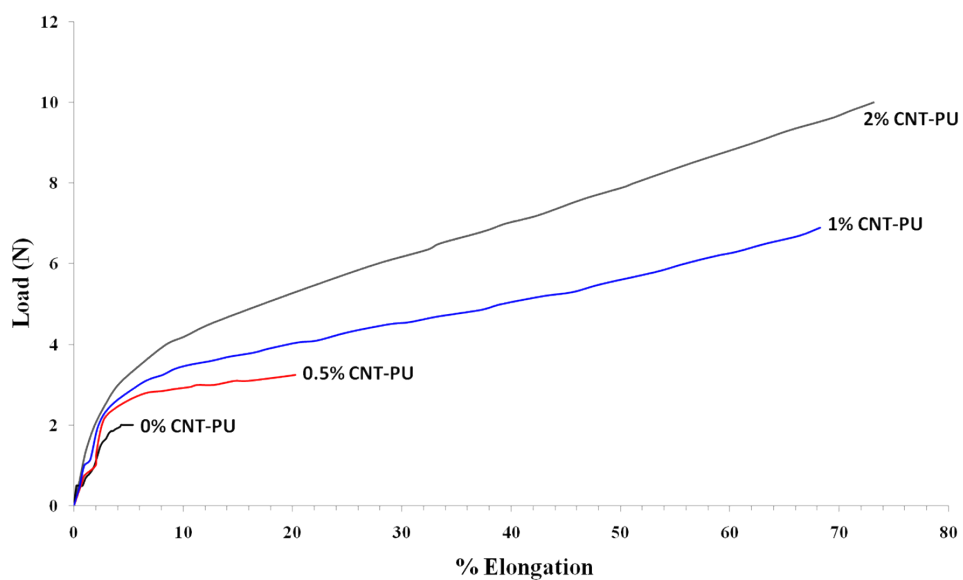

**Figure S13.** Stress vs. strain curves of (UTM analysis) various CNT-PUs

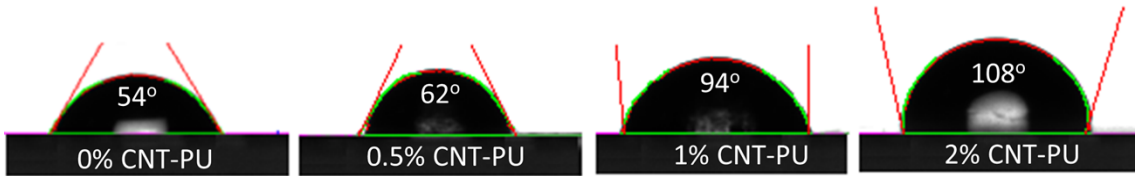

**Figure S14.** Contact angle measurements of different CNT-PU films

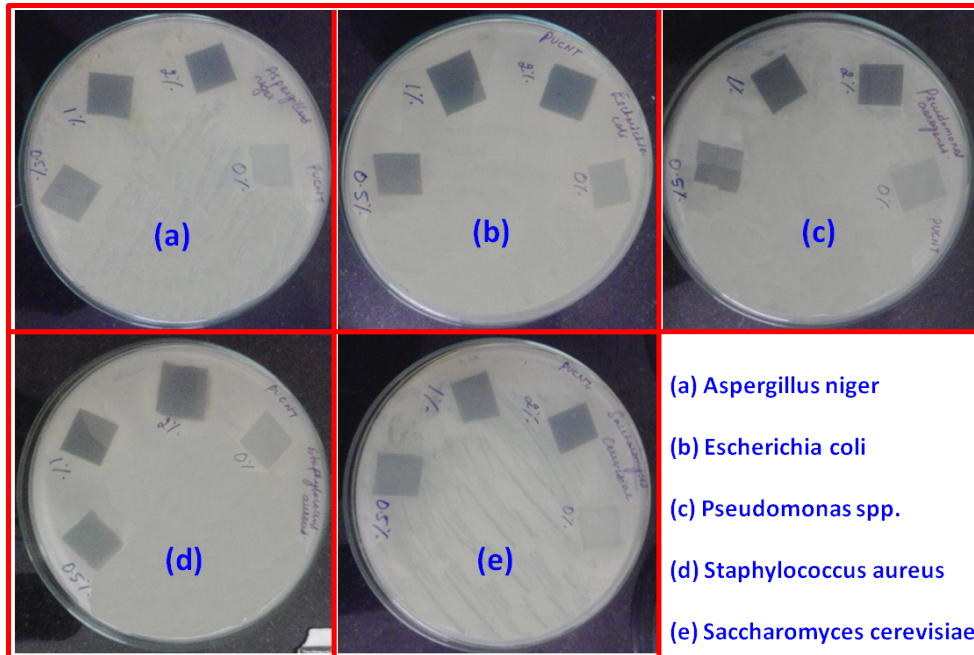

**Figure S15.** Antimicrobial activity of CNT-PU coating films on different bacteria and fungus.

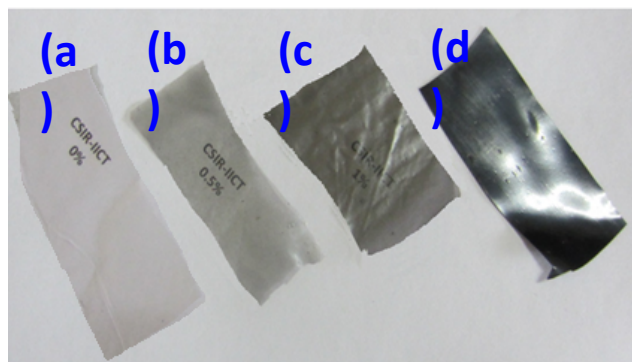

**Figure S16.** Photographs of (a) 0% CNT-PU (pure) (b) 0.5% CNT-PU (c) 1% CNT-PU (d) 2% CNT-PU



**Table S1.** TGA profile of various CNTs

| <b>Sample code</b> | <b>Onset decomposition Temperature (T<sub>ON</sub>) (°C)</b> | <b>10%, wt loss temperature (T<sub>d10</sub>) (°C)</b> | <b>% wt remaining at 500°C</b> | <b>% wt remaining at 600°C</b> | <b>% wt remaining at 700°C</b> |
|--------------------|--------------------------------------------------------------|--------------------------------------------------------|--------------------------------|--------------------------------|--------------------------------|
| <b>CNT</b>         | 583.90                                                       | 652.71                                                 | 98.32                          | 94.93                          | 85.20                          |
| <b>CNT-COOH</b>    | 572.14                                                       | 630.42                                                 | 97.35                          | 92.65                          | 82.62                          |
| <b>CNT-alkyne</b>  | 470.72                                                       | 620.62                                                 | 95.36                          | 91.24                          | 84.28                          |
| <b>CNT-HBP</b>     | 379.94                                                       | 390.57                                                 | 73.05                          | 51.26                          | 35.65                          |

**Table S2.** Raman profile of pristine CNT, CNT-COOH, CNT-Alkyne and CNT-HBP

| <b>Sample code</b> | <b>D peak(cm<sup>-1</sup>)</b> | <b>G peak(cm<sup>-1</sup>)</b> | <b>I<sub>D</sub>/I<sub>G</sub></b> | <b>FWHM (D-band)</b> | <b>FWHM (G-band)</b> |
|--------------------|--------------------------------|--------------------------------|------------------------------------|----------------------|----------------------|
| CNT                | 1312.42                        | 1573.99                        | 1.88                               | 54                   | 67.5                 |
| CNT-COOH           | 1318.91                        | 1573.34                        | 1.99                               | 57.38                | 67.5                 |
| CNT-alkyne         | 1318.91                        | 1566.21                        | 1.86                               | 50.63                | 64.13                |
| CNT-HBP            | 1318.91                        | 1590.22                        | 1.94                               | 54                   | 64.13                |

**Table S3.** Solubility behavior of various CNT samples in different solvent systems

| <b>Compounds</b>  | <b>Time</b> | <b>Water</b> | <b>Ethanol</b> | <b>DMF</b> | <b>Toluene</b> |
|-------------------|-------------|--------------|----------------|------------|----------------|
| <b>CNT</b>        | 15min       | -            | -              | +          | -              |
| <b>CNT-COOH</b>   | 15min       | ±            | +              | +          | ±              |
| <b>CNT-Alkyne</b> | 15min       | +            | +              | +          | ±              |
| <b>CNT-HBP</b>    | 15min       | +            | +              | +          | ±              |
| <b>CNT</b>        | 3h          | -            | -              | +          | -              |
| <b>CNT-COOH</b>   | 3h          | -            | +              | +          | -              |
| <b>CNT-Alkyne</b> | 3h          | +            | +              | +          | -              |
| <b>CNT-HBP</b>    | 3h          | +            | +              | +          | -              |
| <b>CNT</b>        | 6h          | -            | -              | +          | -              |
| <b>CNT-COOH</b>   | 6h          | -            | +              | +          | -              |
| <b>CNT-Alkyne</b> | 6h          | +            | +              | +          | -              |
| <b>CNT-HBP</b>    | 6h          | +            | +              | +          | -              |
| <b>CNT</b>        | 24h         | -            | -              | +          | -              |
| <b>CNT-COOH</b>   | 24h         | -            | +              | +          | -              |
| <b>CNT-Alkyne</b> | 24h         | +            | +              | +          | -              |
| <b>CNT-HBP</b>    | 24h         | +            | +              | +          | -              |

**Table S4.** Mechanical properties of CNT-PU hybrids (from UTM analysis)

| <b>Sample code</b> | <b>Tensile strength<br/>(N/mm<sup>2</sup>)</b> | <b>Elongation at<br/>break(%)</b> |
|--------------------|------------------------------------------------|-----------------------------------|
| <b>0%CNT-PU</b>    | 1.25                                           | 10.74                             |
| <b>0.5%CNT-PU</b>  | 2.031                                          | 40.5                              |
| <b>1%CNT-PU</b>    | 4.31                                           | 136.5                             |
| <b>2%CNT-PU</b>    | 6.25                                           | 146.3                             |

**Table S5.** TGA profile of various CNT-PU

| Sample code | Onset decomposition Temperature ( $T_{ON}$ ) (°C) | 10%, wt loss temperature ( $T_{d10}$ ) (°C) | 50%, wt loss temperature ( $T_{d50}$ ) (°C) | % wt remaining at 350°C |
|-------------|---------------------------------------------------|---------------------------------------------|---------------------------------------------|-------------------------|
|             | 0%CNT-PU                                          | 247.02                                      | 286.67                                      | 335.45                  |
| 0.5%CNT-PU  | 251.91                                            | 284.40                                      | 336.02                                      | 40.09                   |
| 1%CNT-PU    | 254.45                                            | 291.21                                      | 339.42                                      | 42.61                   |
| 2%CNT-PU    | 256.34                                            | 292.34                                      | 343.39                                      | 45.90                   |

**Table S6.** The electrochemical parameters measured from the Tafel plots of different CNT-PU hybrid coatings along with bare metal.

| Sample code           | Coating thickness ( $\mu m$ ) | $E_{corr}$ (mV) | $I_{corr}$ (nA/cm <sup>2</sup> ) | Polarization resistance ( $R_p$ ) (kOhm cm <sup>2</sup> ) | Corrosion rate ( $C_R$ ) (mm/yr) |
|-----------------------|-------------------------------|-----------------|----------------------------------|-----------------------------------------------------------|----------------------------------|
| Bare mild steel panel | -                             | -476.6          | $3.86 \times 10^3$               | 8.85                                                      | 0.047                            |
| 1%CNT-PU              | 67                            | -474.4          | $1.12 \times 10^3$               | 490.64                                                    | 0.012                            |
| 2%CNT-PU              | 69                            | -200.0          | 164                              | 3502.07                                                   | 0.0019                           |

**Table S7.** Shape recovery behavior of various CNT-PU samples

| Sample code | % Elongation | 100 % Shape recovery time (approximately) |         |
|-------------|--------------|-------------------------------------------|---------|
|             |              | Room Temp.                                | At 60°C |
| 0.5% CNT-PU | 30           | 40 sec                                    | 20 sec  |
| 1% CNT-PU   | 130          | 25 sec                                    | 10 sec  |
| 2% CNT-PU   | 130          | 20 sec                                    | 10 sec  |
